# Supplementary material for: The effect of particle size on the optical and electronic properties of magnesium oxide nanoparticles
Source: Royal Society of Chemistry journal article supplement (doi:10.1039/d1cp02683f), 2021-01-01
Supplement: d1cp02683f2.pdf [file d1cp02683f2.pdf]

Supporting information for

**The Effect of Particle Size on the Optical and Electronic Properties of Magnesium Oxide Nanoparticles**

Martijn A. Zwijnenburg

Department of Chemistry, University College London, 20 Gordon Street,  
London WC1H 0AJ, U.K.

Email: [m.zwijnenburg@ucl.ac.uk](mailto:m.zwijnenburg@ucl.ac.uk)

**Table S1** Occupied (–IP) and unoccupied (–EA) edge states, fundamental gap ( $\Delta_F$ ), optical gap ( $\Delta_O$ ) and exciton binding energy (EBE) values of (MgO)<sub>32</sub> as calculated using BSE/*G<sub>0</sub>W<sub>0</sub>*(AC)/def2-TZVPP and BSE/evGW(AC)/def2-TZVPP starting from PBE rather than B3LYP orbitals. The geometry used was that obtained using B3LYP/def2-TZVPP.

| MgO        | <i>G<sub>0</sub>W<sub>0</sub></i> @PBE |        |            |            |      | evGW@PBE |        |            |            |      |
|------------|----------------------------------------|--------|------------|------------|------|----------|--------|------------|------------|------|
|            | –IP                                    | –EA    | $\Delta_F$ | $\Delta_O$ | EBE  | –IP      | –EA    | $\Delta_F$ | $\Delta_O$ | EBE  |
| 32 (4:4:4) | -7.018                                 | -0.610 | 6.41       | 3.312      | 3.10 | -8.226   | -0.245 | 7.98       | 4.815      | 3.17 |

**Table S2** Occupied (–IP) and unoccupied (–EA) edge states, fundamental gap ( $\Delta_F$ ), optical gap ( $\Delta_O$ ) and exciton binding energy (EBE) values of (MgO)<sub>18</sub> as calculated by the different method combinations and the def2-TZVPP basis-set.

| MgO        | <i>G<sub>0</sub>W<sub>0</sub></i> |        |            |            |      | evGW   |        |            |            |      |
|------------|-----------------------------------|--------|------------|------------|------|--------|--------|------------|------------|------|
|            | –IP                               | –EA    | $\Delta_F$ | $\Delta_O$ | EBE  | –IP    | –EA    | $\Delta_F$ | $\Delta_O$ | EBE  |
| 18 (3:3:3) | -6.807                            | -0.892 | 5.92       | 3.434      | 2.48 | -7.481 | -0.670 | 6.81       | 4.299      | 2.51 |

**Table S3** Occupied (–IP) and unoccupied (–EA) edge states, fundamental gap ( $\Delta_F$ ), optical gap ( $\Delta_O$ ) and exciton binding energy (EBE) values of the alternative structure for (MgO)<sub>27</sub> as calculated by the different method combinations and the def2-SVP basis-set.

| MgO        | <i>G<sub>0</sub>W<sub>0</sub></i> |        |            |            |      | evGW   |        |            |            |      |
|------------|-----------------------------------|--------|------------|------------|------|--------|--------|------------|------------|------|
|            | –IP                               | –EA    | $\Delta_F$ | $\Delta_O$ | EBE  | –IP    | –EA    | $\Delta_F$ | $\Delta_O$ | EBE  |
| 27 (5:3:3) | -6.925                            | -0.385 | 6.54       | 3.653      | 2.89 | -7.563 | -0.159 | 7.40       | 4.482      | 2.92 |

**Table S4** Occupied (–IP) and unoccupied (–EA) edge states, fundamental gap ( $\Delta_F$ ), optical gap ( $\Delta_O$ ) and exciton binding energy (EBE) values of  $(\text{CaO})_{32}$  and  $(\text{SrO})_{32}$  cubes predicted using BSE/ $G_0W_0$ (AC)/def2-TZVPP and BSE/evGW(AC)/def2-TZVPP starting from PBE rather than B3LYP orbitals. The geometry used was that obtained using B3LYP/def2-TZVPP.

|             | $G_0W_0$ |        |            |            |      | evGW   |       |            |            |      |
|-------------|----------|--------|------------|------------|------|--------|-------|------------|------------|------|
|             | –IP      | –EA    | $\Delta_F$ | $\Delta_O$ | EBE  | –IP    | –EA   | $\Delta_F$ | $\Delta_O$ | EBE  |
| CaO (4:4:4) | -5.545   | -0.151 | 5.39       | 2.432      | 2.96 | -6.562 | 0.114 | 6.68       | 3.929      | 2.75 |
| SrO (4:4:4) | -5.051   | -0.200 | 4.85       | 2.293*     | 2.56 | -6.069 | 0.061 | 6.13       | 3.510*     | 2.62 |

\* The lowest excited-state for  $(\text{SrO})_{32}$  as calculated using BSE/ $G_0W_0$ (AC)/def2-TZVPP and BSE/evGW(AC)/def2-TZVPP is symmetry forbidden. The 2.293 and 3.510 eV excitations, respectively, are the lowest optically allowed excitations, second lowest overall. The lowest BSE/ $G_0W_0$ (AC)/def2-TZVPP and BSE/evGW(AC)/def2-TZVPP excitation belongs to the A irrep for  $T_d$  and has an excitation energy of 2.277 eV and an EBE value of 2.57 eV and an excitation energy of 3.493 eV and an EBE value of 2.64 eV, respectively.

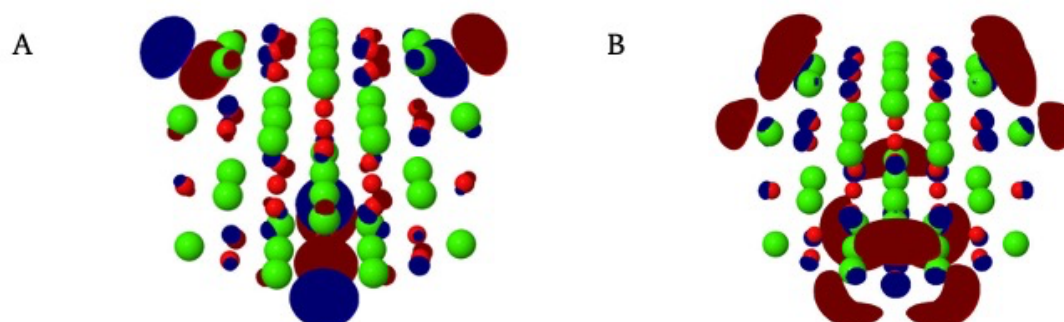

**Fig. S1** Leading occupied (A) and unoccupied (B) natural transition orbitals for the lowest excitation of  $(\text{CaO})_{32}$ . As the calculation was performed using the  $D_2$  instead of the  $T_d$  point group, the triply degenerate  $T_2$  excited state is described as a triplet of excited states of B1, B2 and B3 symmetry, the natural transition orbitals of only one is shown here.
